# Supplementary material for: USP14 governs CYP2E1 to promote nonalcoholic fatty liver disease through deubiquitination and stabilization of HSP90AA1
Source: PubMed Central journal article supplement (PMC10460448; doi:10.1038/s41419-023-06091-6), 2023-08-26

# USP14 governs CYP2E1 to promote nonalcoholic fatty liver disease through deubiquitination and stabilization of HSP90AA1

Dongqin Wei, Xin Tian, Longbo Zhu, Han Wang, Chao Sun

**Fig. 1B**

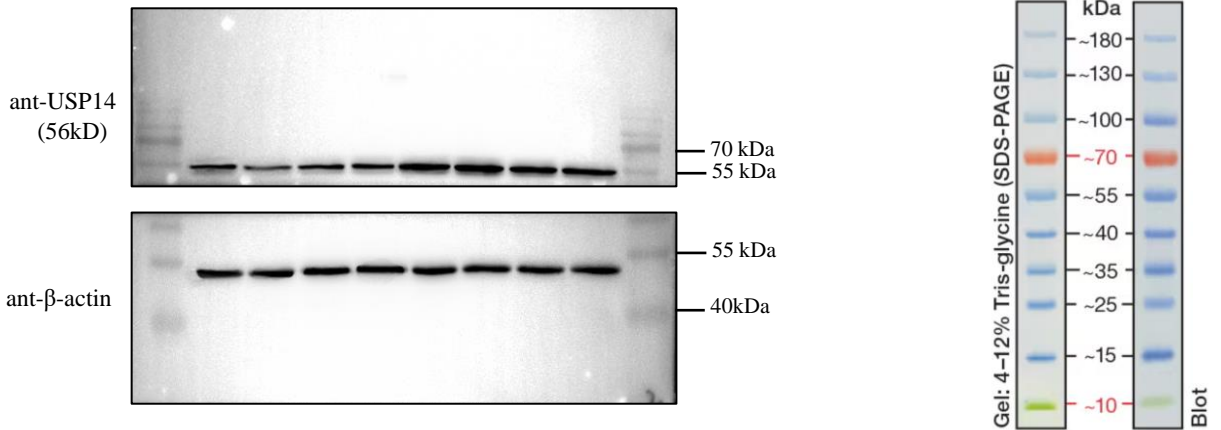

**Fig. 1D**

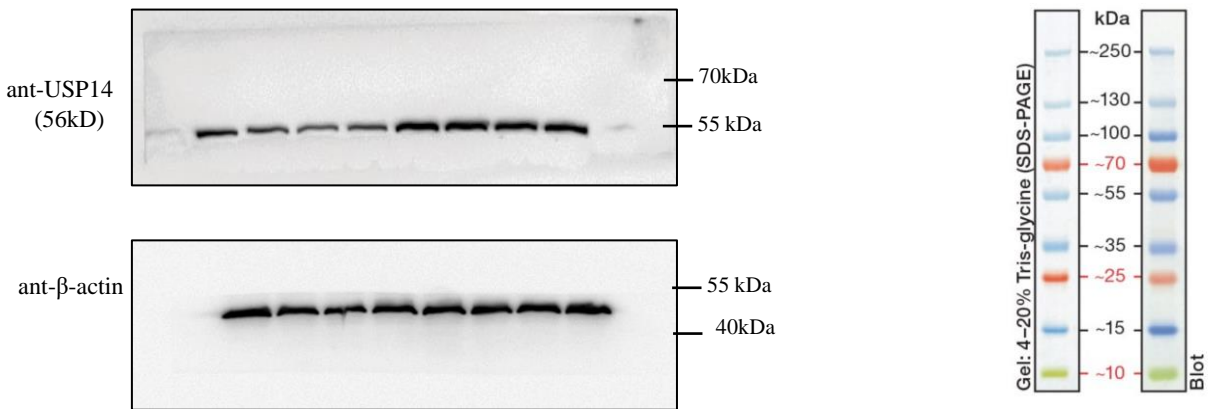

**Fig. 1F**

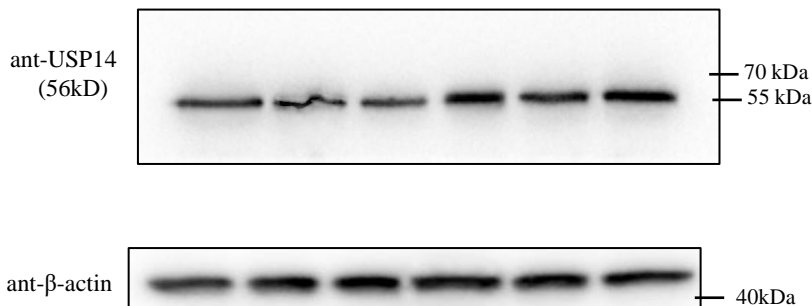

**Fig. S2F**

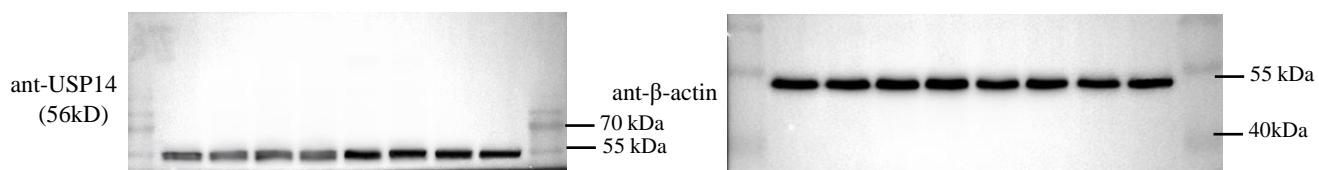

**Fig. 2J**

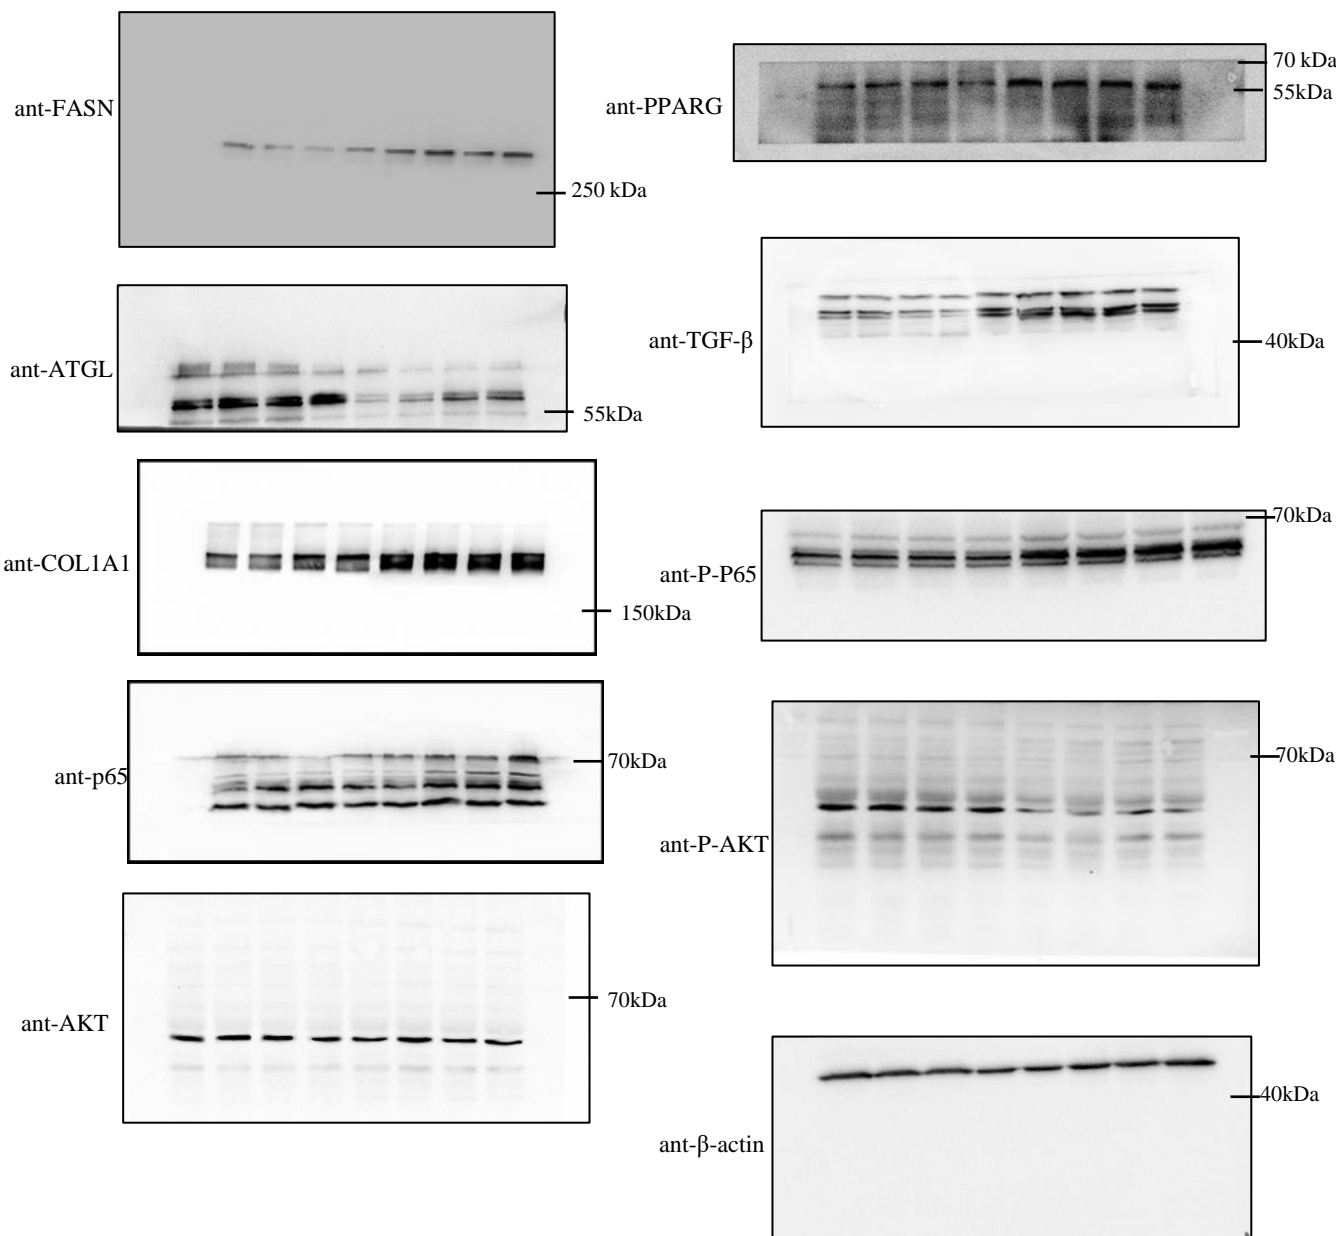

**Fig. 3A**

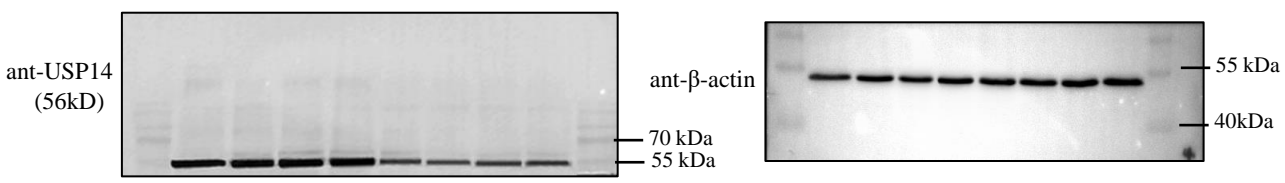

**Fig. 3M**

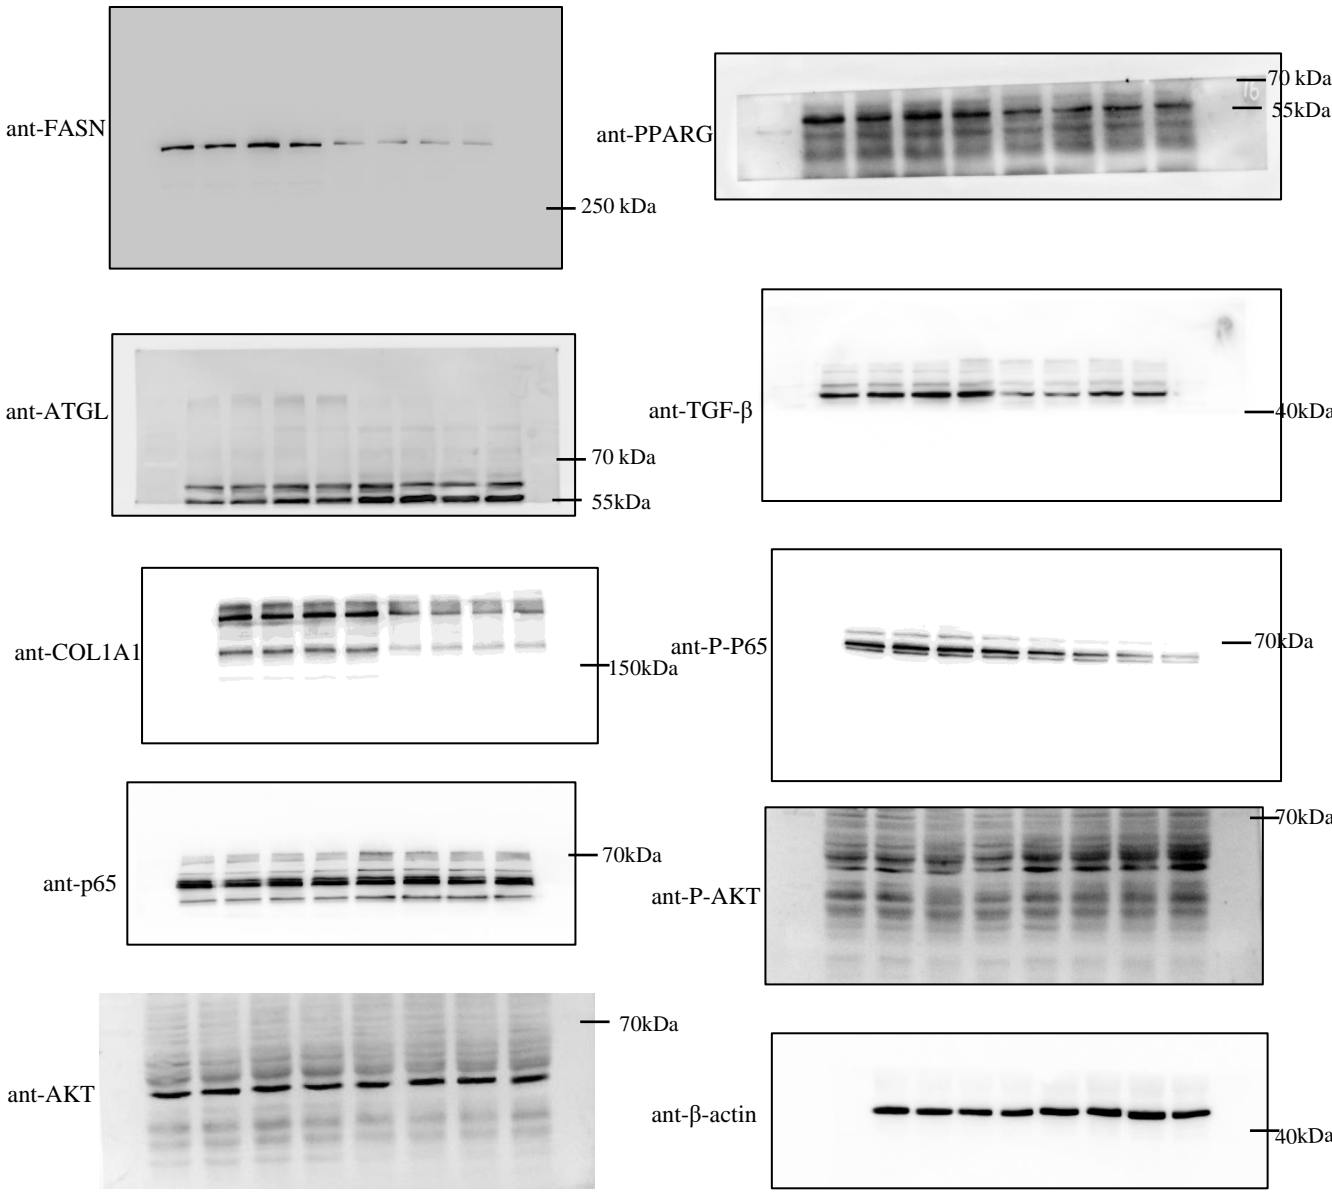

**Fig. S3N**

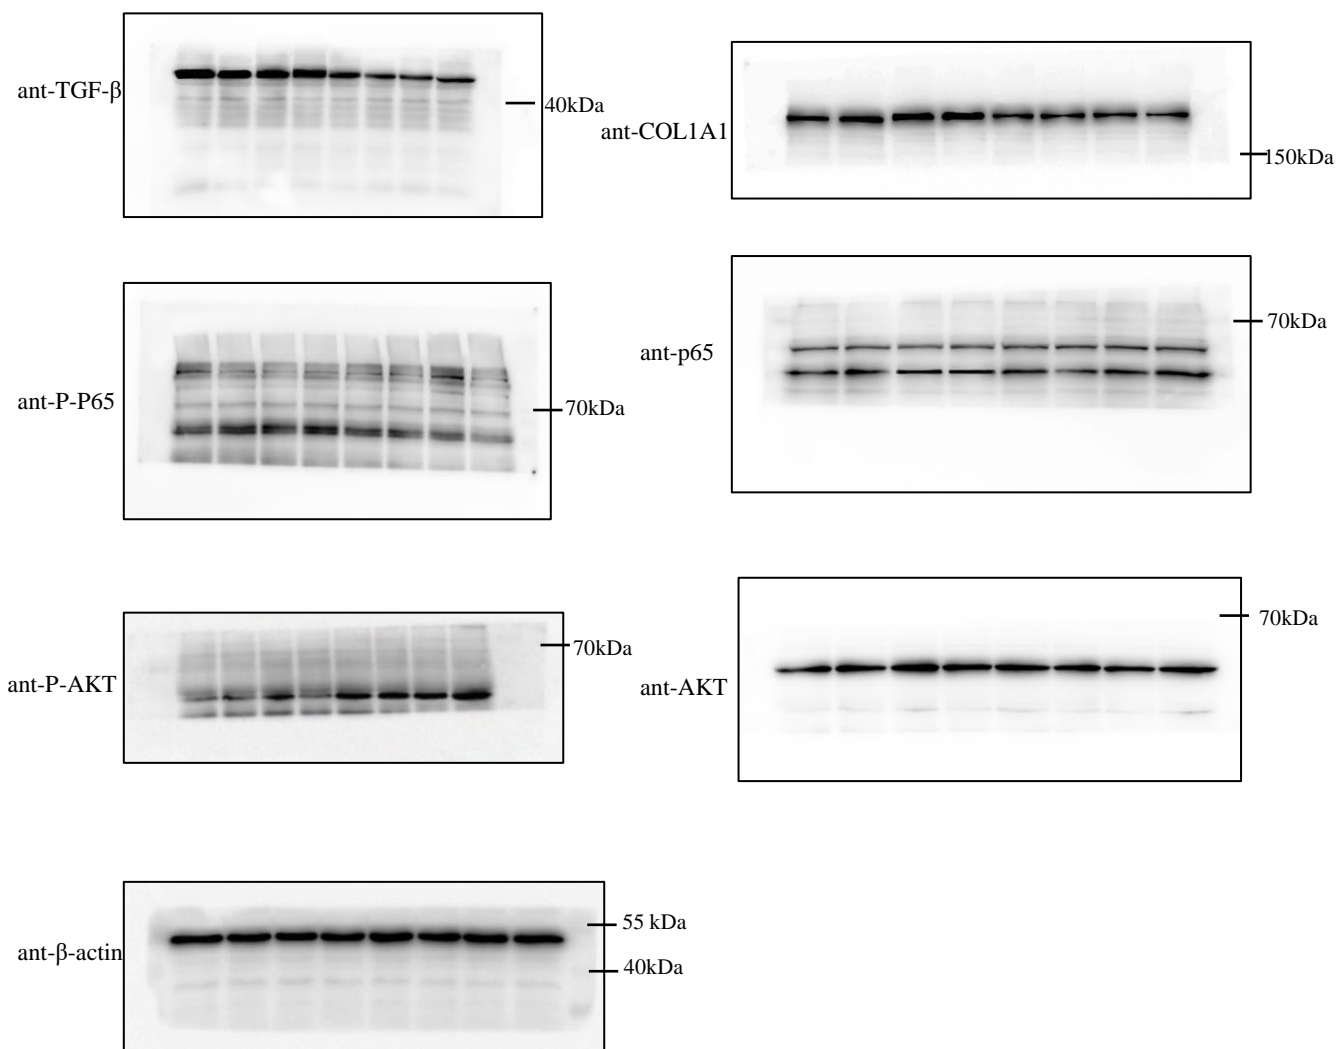

**Fig. S4A**

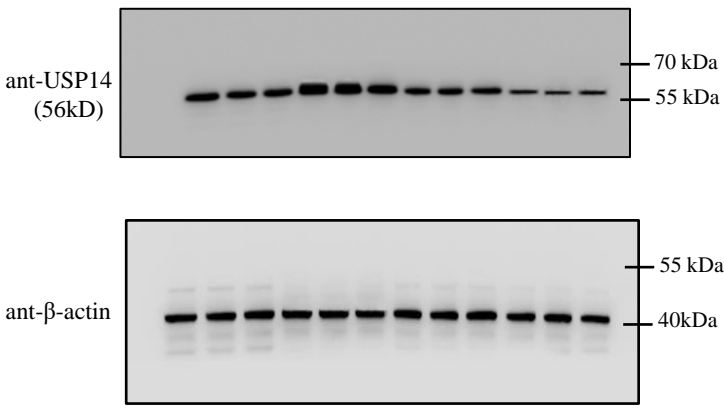

**Fig. 4J**

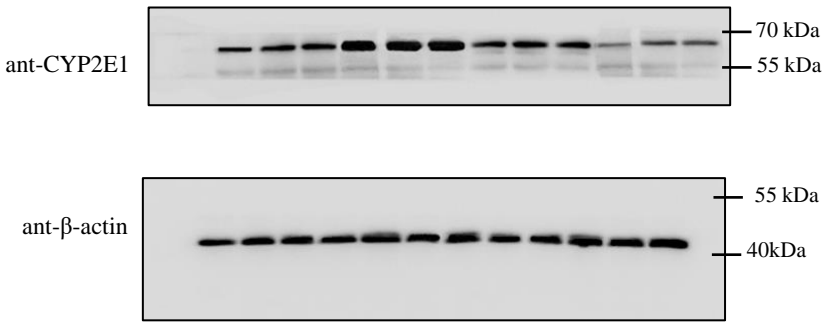

**Fig. 4K**

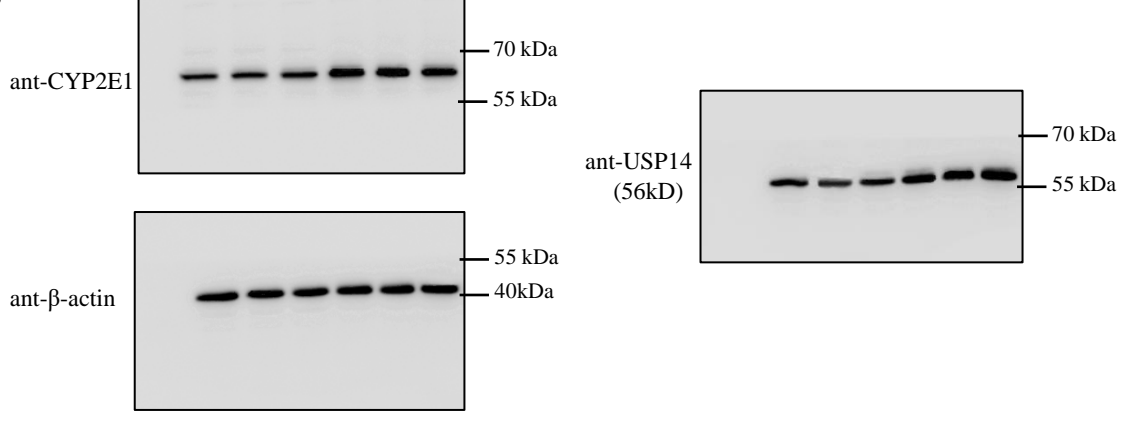

**Fig. 4L**

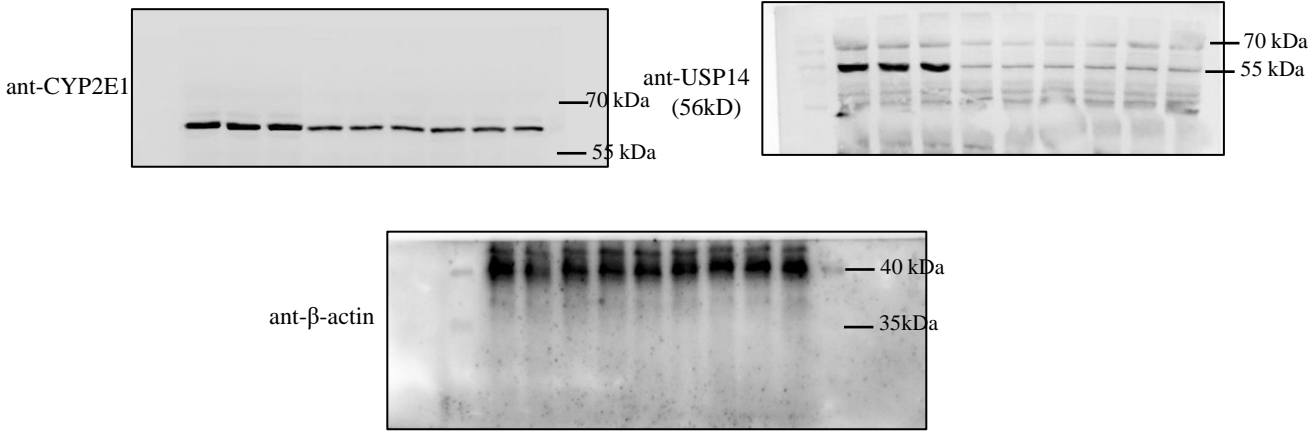

**Fig. 4M**

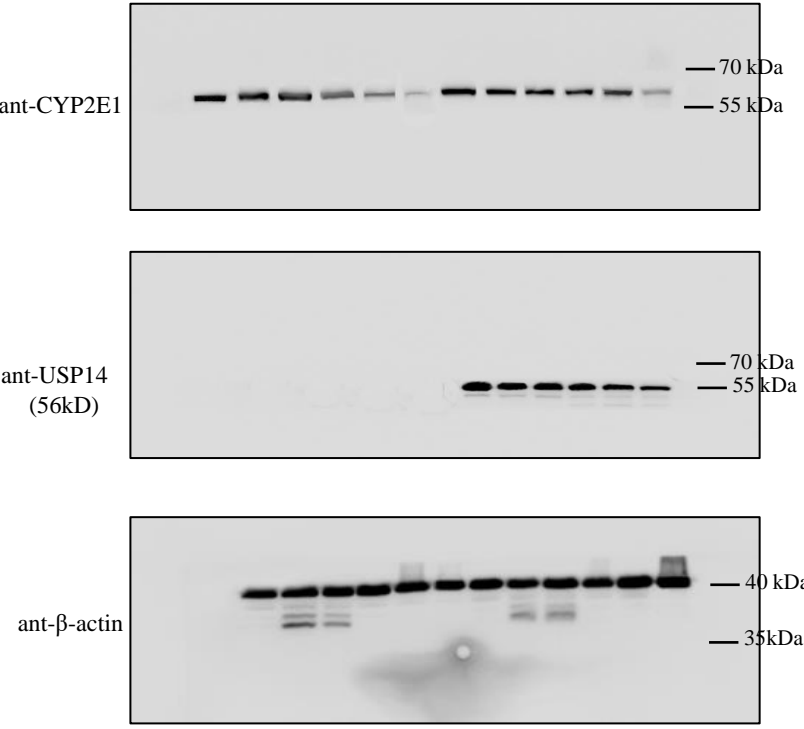

**Fig. S5A**

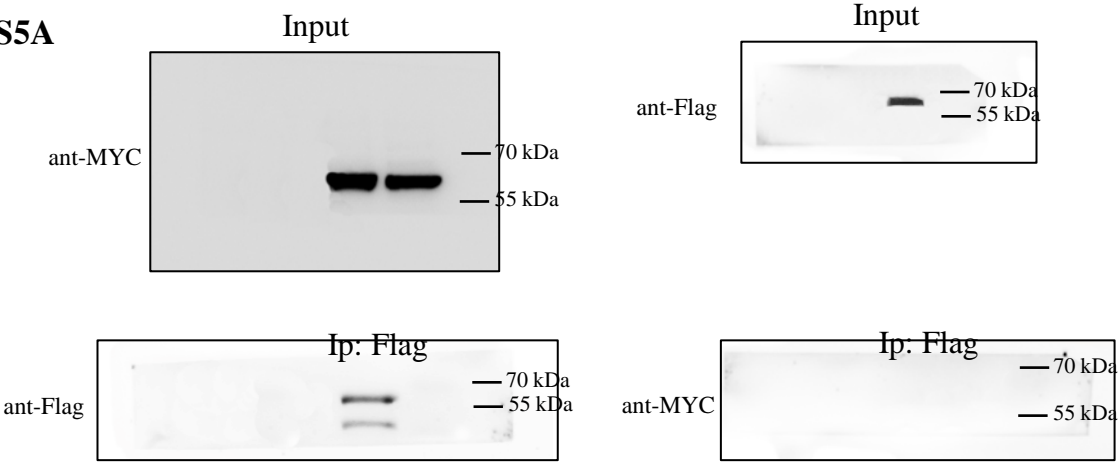

**Fig. 5A**

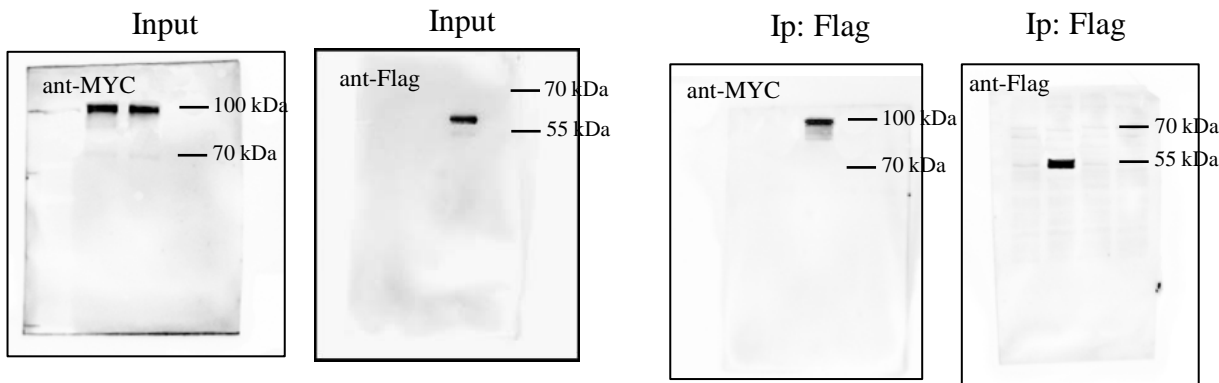

**Fig. 5B**

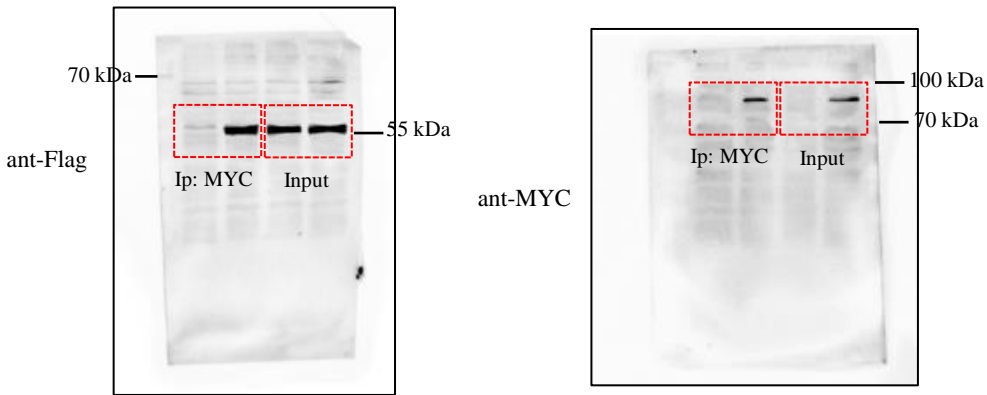

**Fig. 5C**

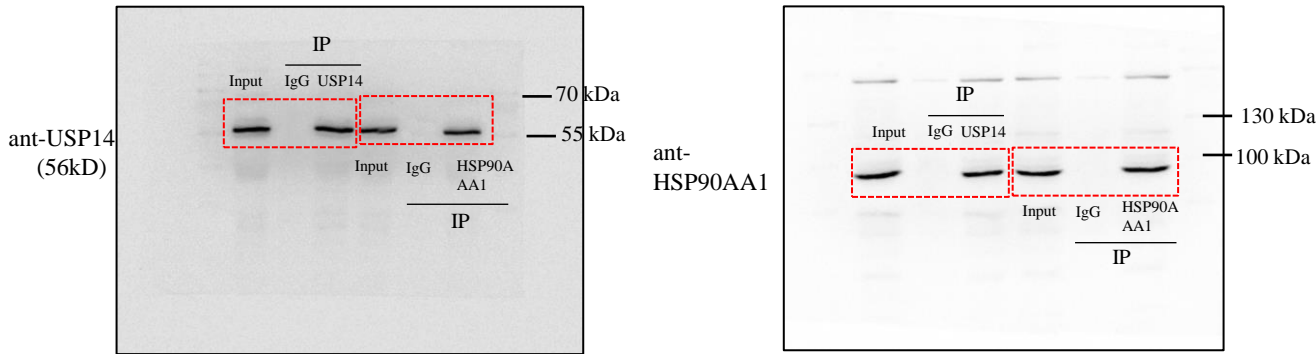

**Fig. 5E**

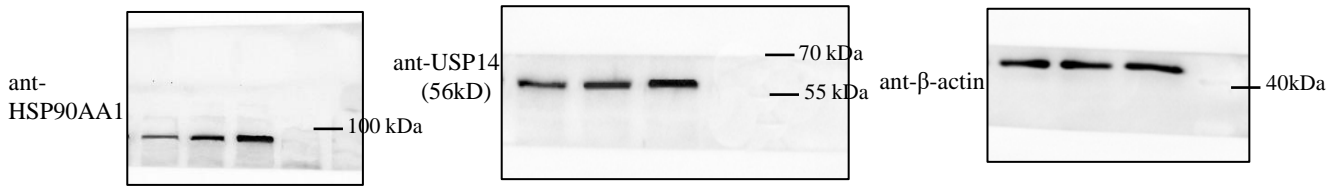

**Fig. 5F**

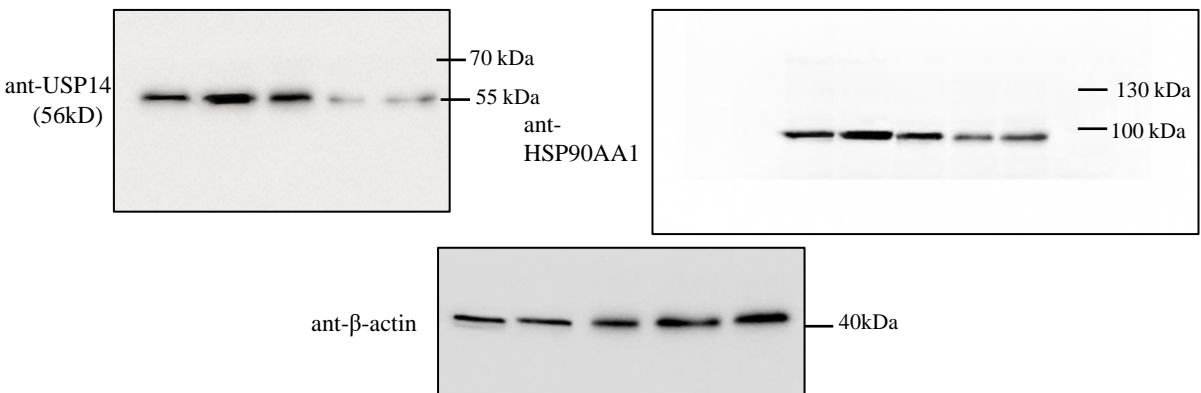

**Fig. S5B**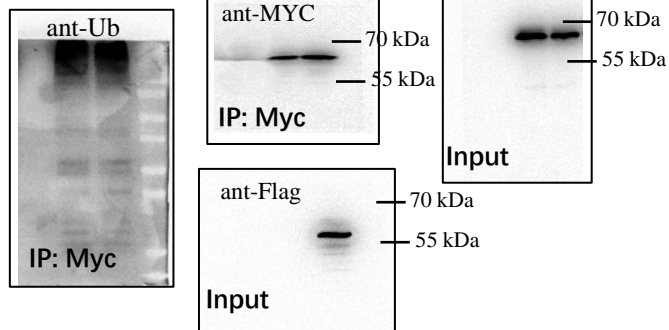**Fig. S5D**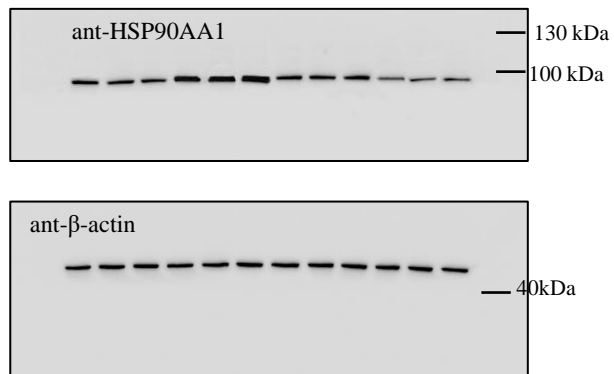**Fig. 5G**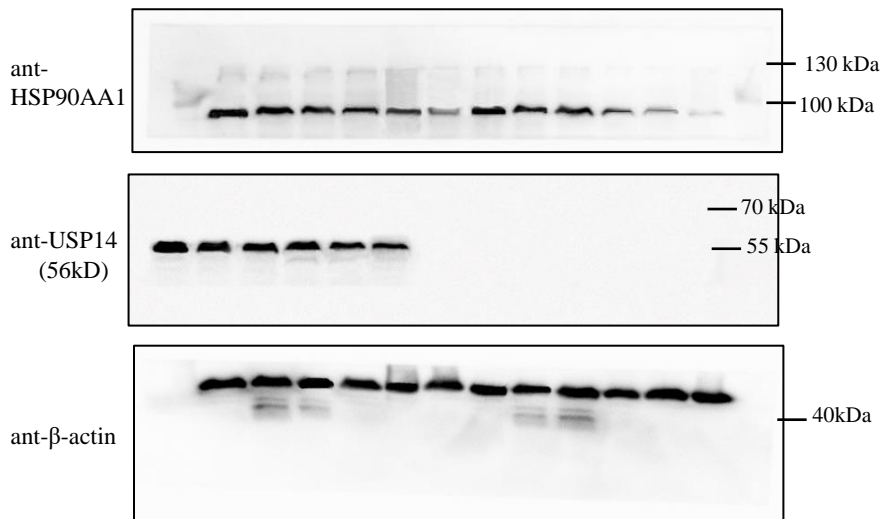**Fig. 5H**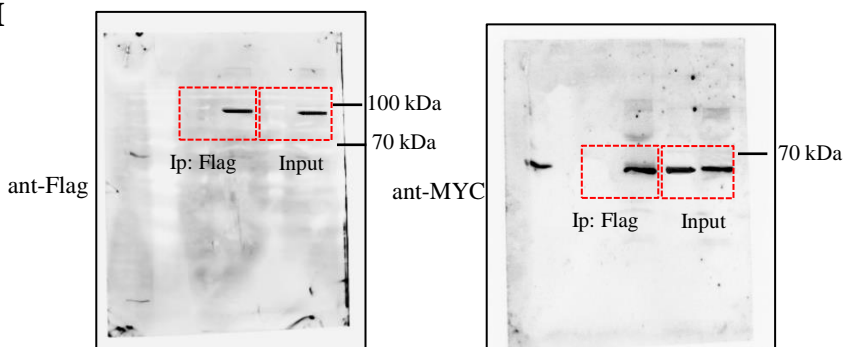**Fig. 5I**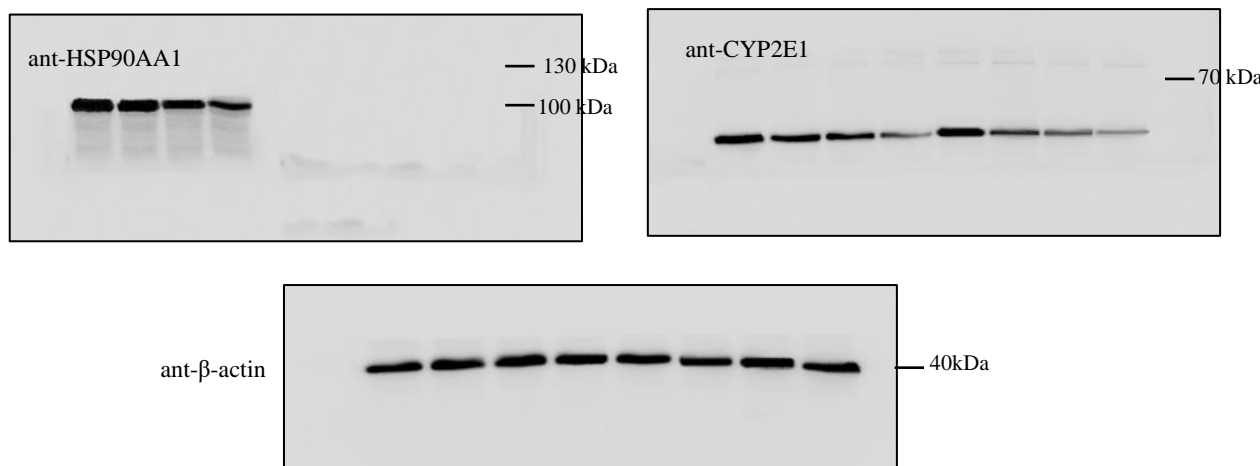



**Fig. 5J**

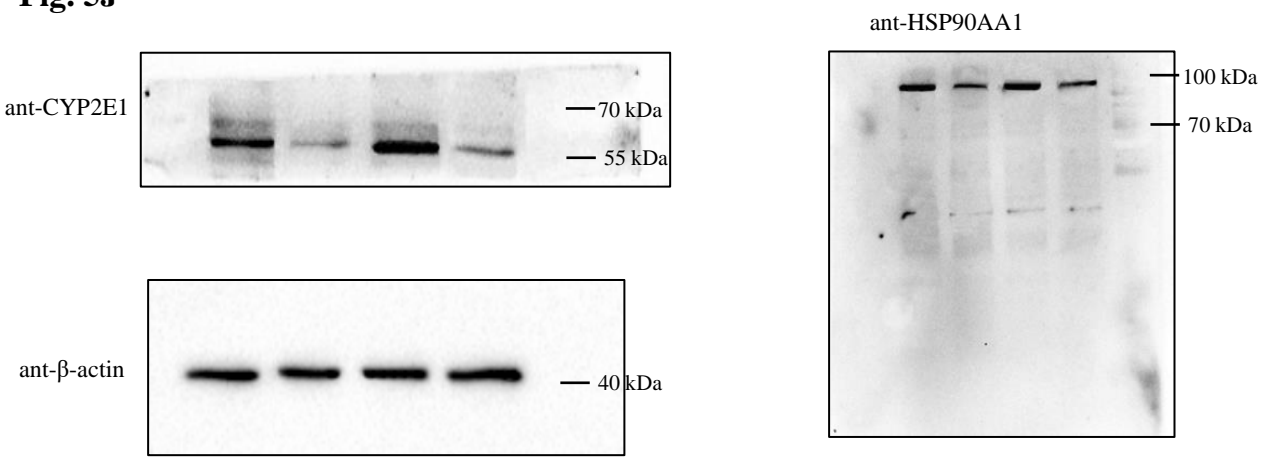

**Fig. 6A**

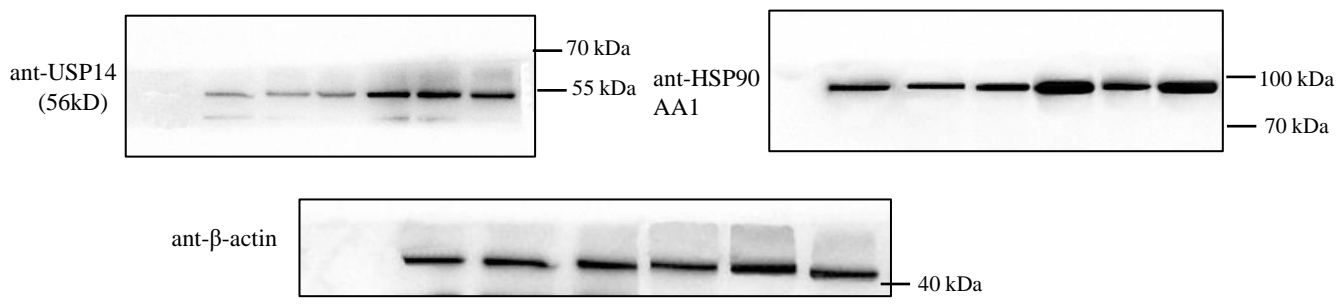

**Fig. 6B**

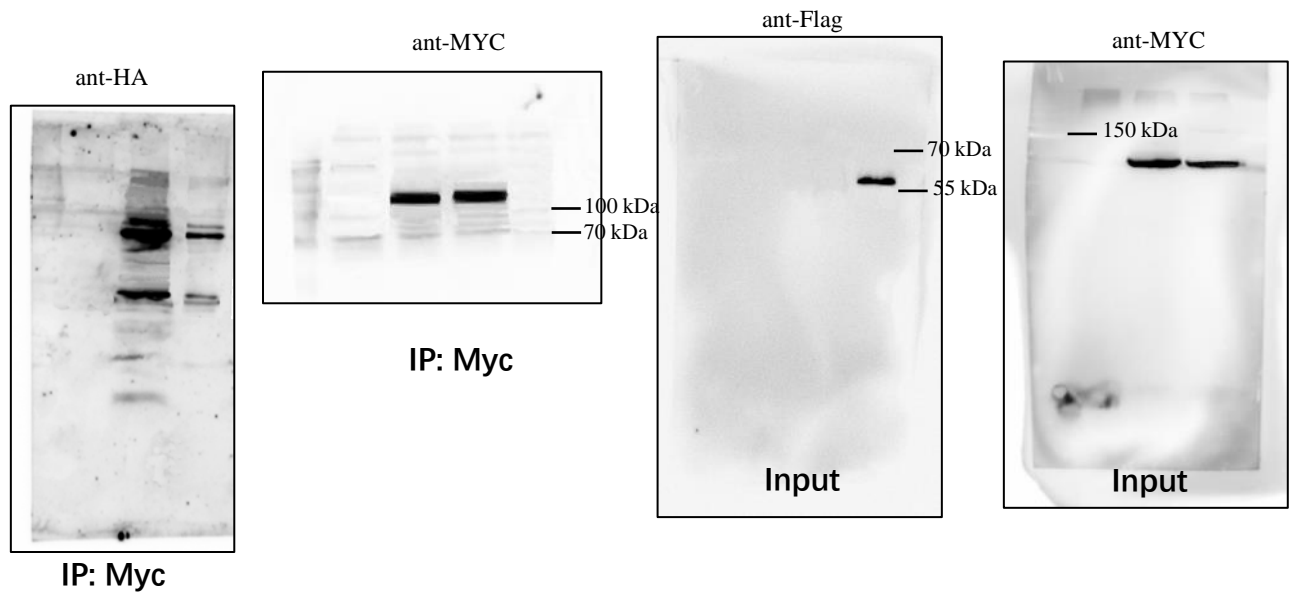

**Fig. 6D**

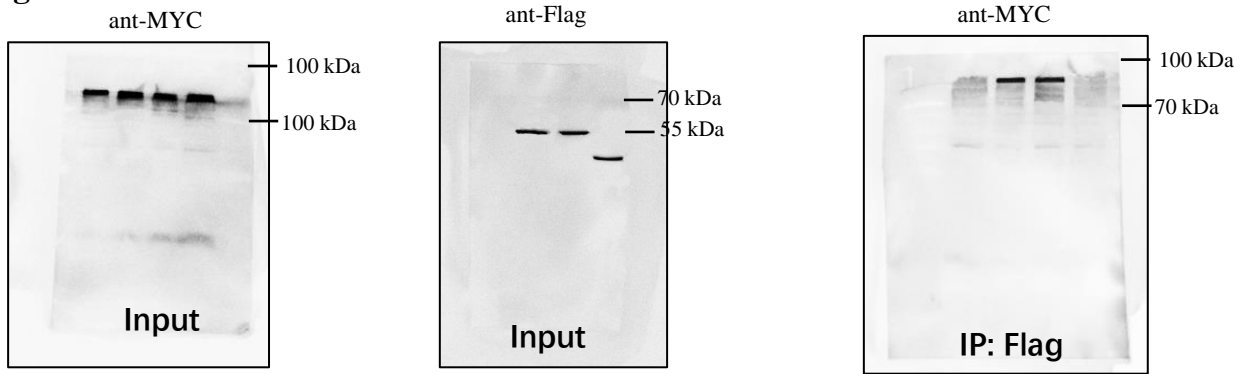

**Fig. 6E**

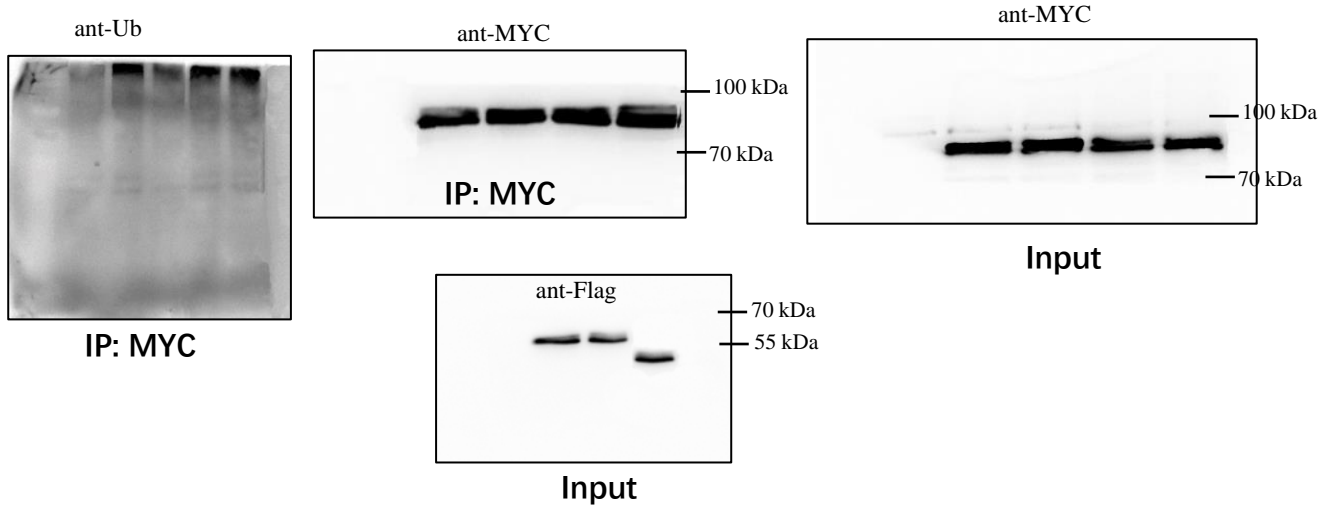

**Fig. 6F**

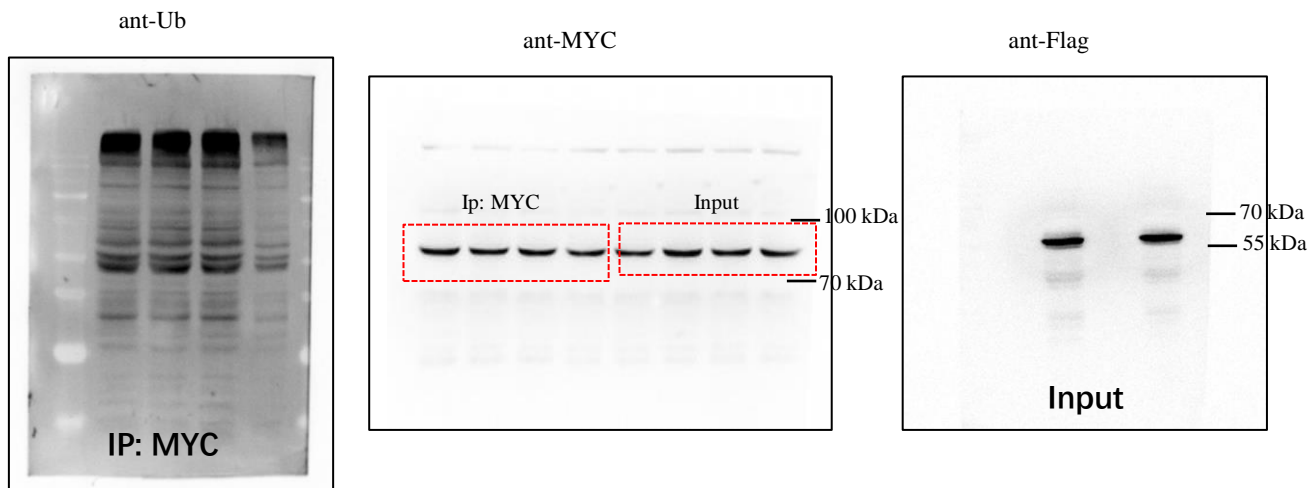

**Fig. S6A**

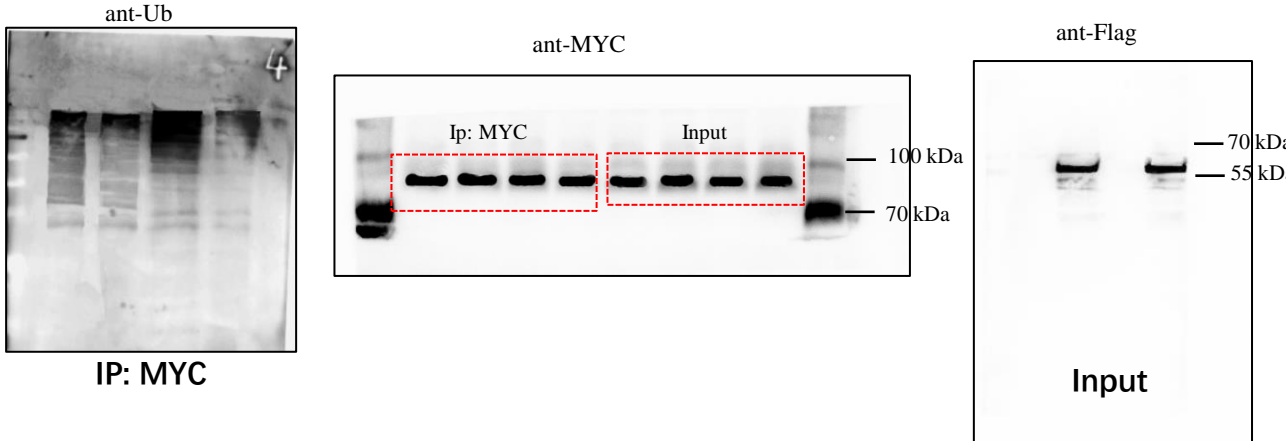

**Fig. S6B**

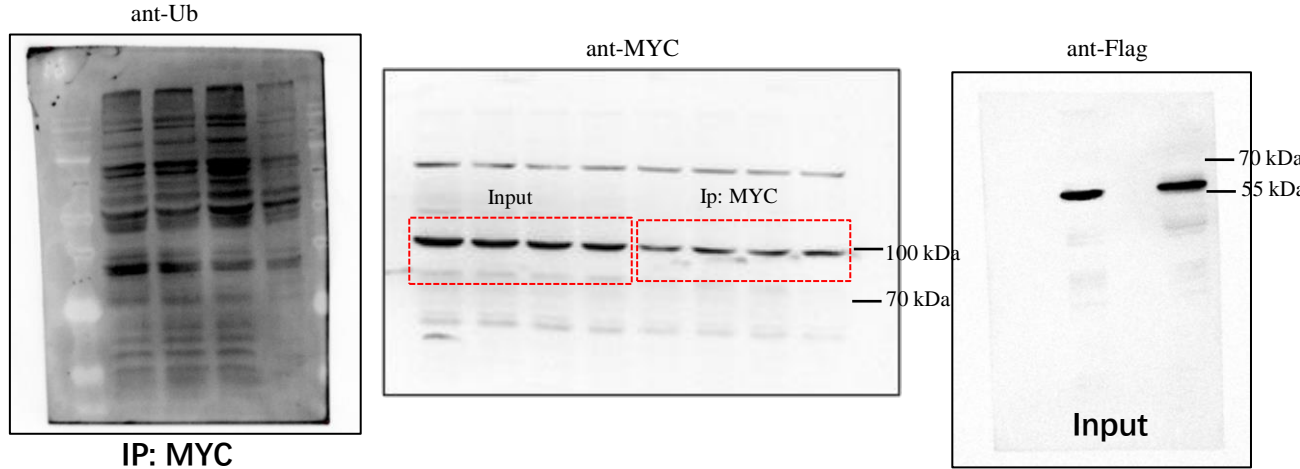

**Fig. 6G**

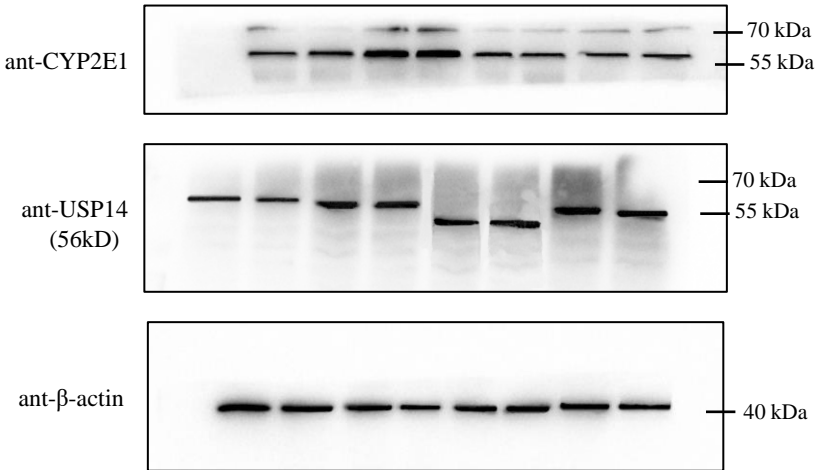

**Fig. S7A**

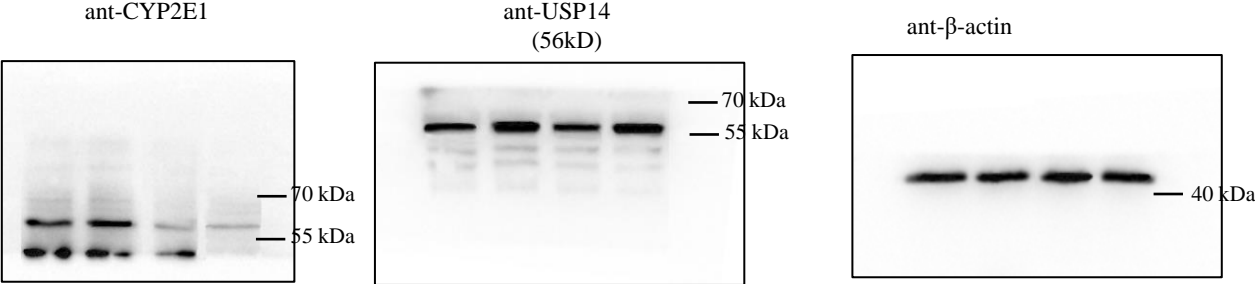

**Fig. S7B**

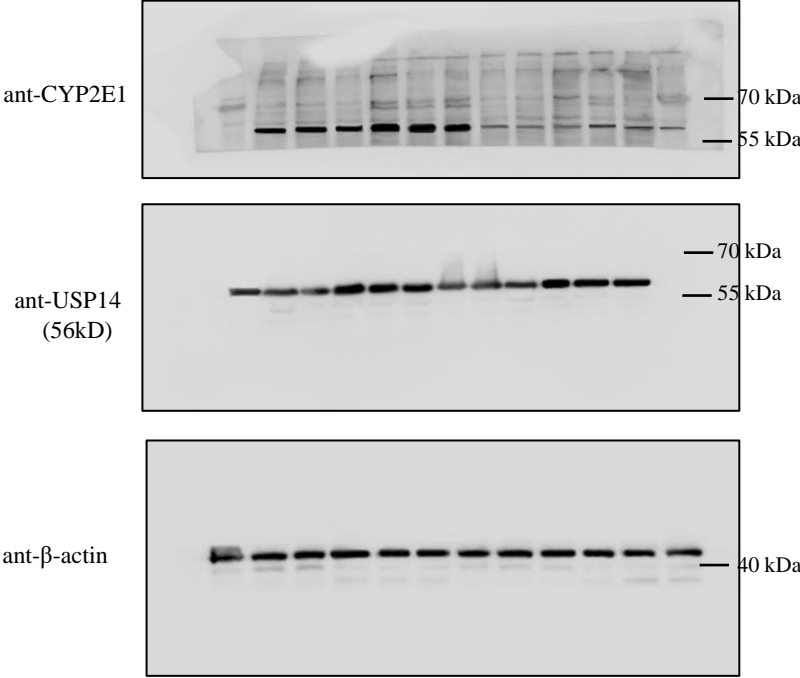

Supplement: 41419_2023_6091_MOESM2_ESM.pdf [file 41419_2023_6091_MOESM2_ESM.pdf]
